# Supplementary material
Source: PubMed Central journal article supplement (PMC2928581)
Supplement: NIHMS217332-supplement-suppl_figs1-6.pdf [file NIHMS217332-supplement-suppl_figs1-6.pdf]

**PI(3,5)P<sub>2</sub> Controls Membrane Traffic by Direct Activation of  
Mucolipin Ca<sup>2+</sup> Release Channels in the Endolysosome**

Xian-ping Dong<sup>1, #</sup>, Dongbiao Shen<sup>1, #</sup>, Xiang Wang<sup>1, #</sup>, Taylor Dawson<sup>1</sup>, Xinran Li<sup>1</sup>, Qi Zhang<sup>1</sup>, Xiping Cheng<sup>1</sup>, Yanling Zhang<sup>2</sup>, Lois Weisman<sup>2</sup>, Markus Delling<sup>3</sup>, and Haoxing Xu<sup>1, \*</sup>

<sup>1</sup> The Department of Molecular, Cellular, and Developmental Biology, the University of Michigan, 3089 National Science Building (Kraus), 830 North University, Ann Arbor, MI 48109, USA

<sup>2</sup> The Department of Cell and Developmental Biology and Life Sciences Institute, University of Michigan, Ann Arbor, MI 48109-2216, USA

<sup>3</sup> The Department of Cardiology, Children's Hospital Boston, Enders 1350, 320 Longwood Avenue, Boston, MA 02115, USA

Running head: TRPML1 is an endolysosomal Ca<sup>2+</sup> release channel specifically activated by PI(3,5)P<sub>2</sub>

<sup>#</sup>These authors contributed equally to this work.

\* To whom correspondence should be addressed: [haoxingx@umich.edu](mailto:haoxingx@umich.edu)

## Supplementary Figures S1-S6

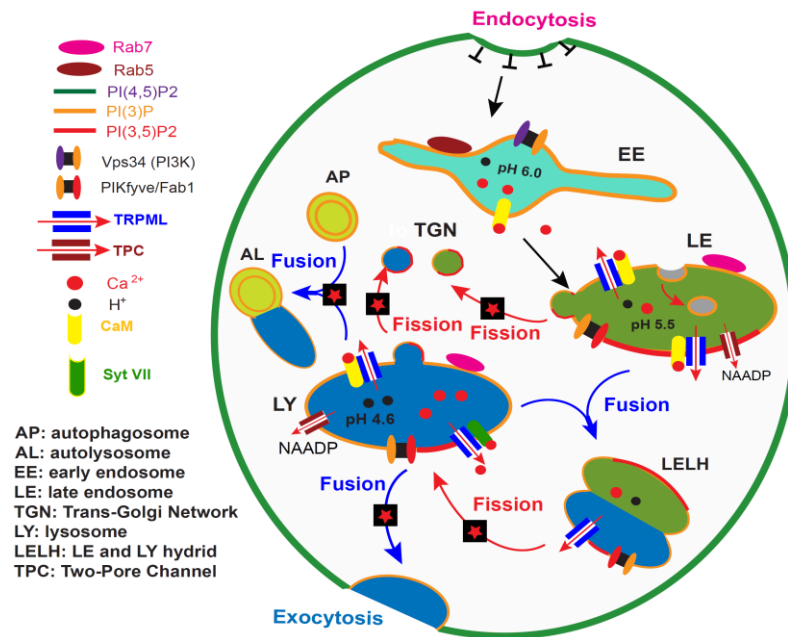

### Supplementary Figure 1. TRPMLs and PIPs in the endocytic pathway.

Intracellular compartments in the endocytic pathways undergo cargo-dependent maturation (indicated by black arrows), membrane fusion (blue arrows), and fission/budding (red arrows). The molecular identities of intracellular compartments were defined by specific recruitment of Rab GTPases, and phosphoinositide (PIP) composition. PI(3)P is synthesized by Vps34 PI 3-kinase in early endosomes (EEs). PI(3,5)P<sub>2</sub> is presumed to be produced in late endosomes and lysosomes (LEs) by PIKfyve/Fab1 PI 5-kinase using PI(3)P as substrate. Endolysosomes are Ca<sup>2+</sup> stores, with a luminal Ca<sup>2+</sup> concentration estimated to be approximately 0.5 mM. The pH of each organelle is indicated. In endolysosomes, TRPML-mediated intra-endosomal Ca<sup>2+</sup> release may activate Ca<sup>2+</sup>-sensor proteins such as synaptotagmin (Syt) and calmodulin (CaM) to trigger homotypic and heterotypic fusion. Early endosomes (EEs; pH 6.0; PI(3)P;) are derived from the primary endocytic vesicles after endocytosis. EEs can undergo maturation through membrane trafficking to become late endosomes (LEs; pH 5.5; PI(3)P + PI(3,5)P<sub>2</sub>). LEs can fuse with lysosomes (LYs; pH 4.5; PI(3)P+PI(3,5)P<sub>2</sub>) to form LE-LY hybrids. LYs can be reformed from LE-LY hybrids (LELH) in a fission-dependent mechanism. Besides fusion with LEs, LYs also fuse with autophagosomes (APs) to form autolysosomes (ALs), or fuse with the plasma membrane in exocytosis. TRPML1-3 channels are predominantly localized in LEs and LYs. Activation of TRPML channels by PI(3,5)P<sub>2</sub> may induce intralysosomal Ca<sup>2+</sup> release. Alternatively, activation of Two-pore Channels (TPCs) by NAADP may also induce intralysosomal Ca<sup>2+</sup> release. LEs,

LYs, or LE-LY hybrids undergo CaM- or Syt- dependent membrane fusion or fission and budding. Retrograde transport vesicles, derived from LEs or LYs upon membrane fission, transport lipids and proteins in a retrograde direction to the trans-Golgi Network (TGN). Stars indicate membrane fusion and fission processes that are reportedly defective in both TRPML1-deficient and PI(3,5)P<sub>2</sub>-deficient cells.

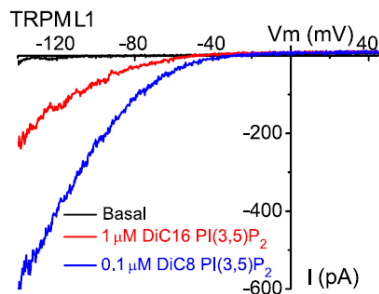

### Supplementary Figure 2. Activation of TRPML1 by full length diC16 PI(3,5)P<sub>2</sub>.

Long-chain phosphoinositide diC16 PI(3,5)P<sub>2</sub> activated whole-endolysosome  $I_{TRPML1}$ .  $I_{TRPML1}$  was elicited by voltage ramps (-140 to +140 mV; 400 ms).

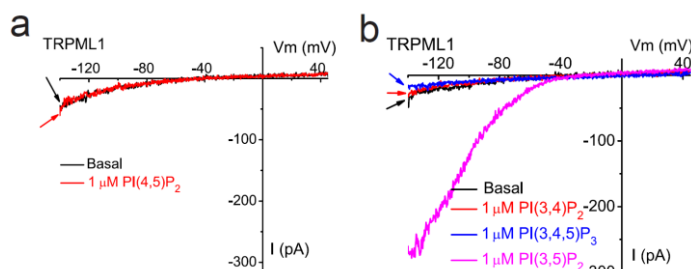

### Supplementary Figure 3. Specific activation of TRPML1 by PI(3,5)P<sub>2</sub>.

**a)** Whole-endolysosome  $I_{TRPML1}$  was insensitive to PI(4,5)P<sub>2</sub> (1 μM). **b)** Insensitivity of  $I_{TRPML1}$  to PI(4,5)P<sub>2</sub> (1 μM) or PI(3,4,5)P<sub>3</sub> (1 μM). PI(3,5)P<sub>2</sub> readily activated  $I_{TRPML1}$  in the same vacuole.

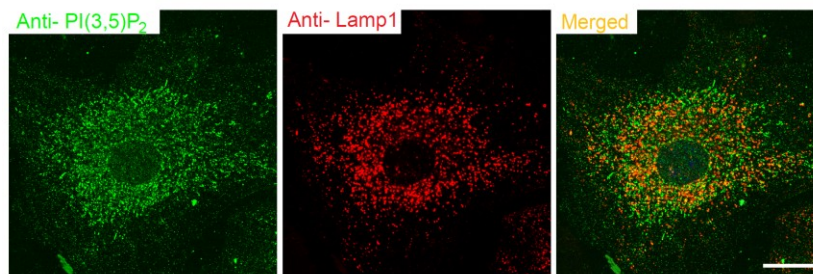

### Supplementary Figure 4. Immunofluorescence of PI(3,5)P<sub>2</sub> in Lamp1-positive compartments.

Mouse fibroblast cells were immunostained with anti-PI(3,5)P<sub>2</sub> (green) and anti-Lamp1 (red). The majority of Lamp1-positive compartments were immunostained by anti-PI(3,5)P<sub>2</sub>, which also recognized some Lamp1-negative compartments. Scale Bar = 10 μm.

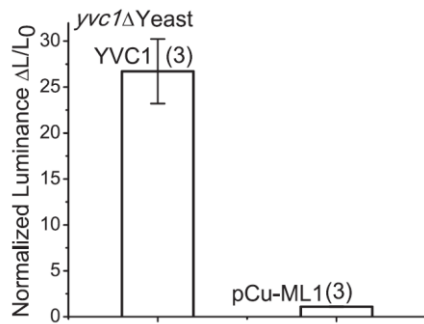

**Supplementary Figure 5. Overexpression of TRPML1 in *fab1Δ* cells failed to restore hyperosmolarity-induced  $Ca^{2+}$  response.**

TRPML1 is expressed using the pCu expression vector (pCu-ML1). Hyperosmolarity-induced  $Ca^{2+}$  responses were measured using the aequorin-mediated luminescence assay. Hyperosmotic shock was induced by addition of 0.9 M NaCl. Hyperosmolarity-induced  $Ca^{2+}$  responses (normalized with baseline luminescence before hyperosmotic shock) from *fab1Δ* cells, and pCu-ML1-transformed *yvc1Δ* cells were re-plotted from Fig. 6 for comparison.

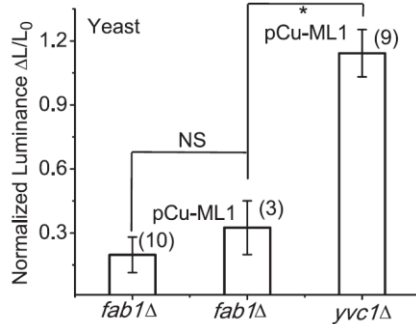

**Supplementary Figure 6. Overexpression of YVC1 in *yvc1Δ* cells restored hyperosmolarity-induced  $Ca^{2+}$  response.**

YVC1 is expressed using the pVT expression vector. Hyperosmolarity-induced  $Ca^{2+}$  responses were measured using the aequorin-mediated luminescence assay. Hyperosmotic shock was induced by addition of 0.9 M NaCl. Hyperosmolarity-induced  $Ca^{2+}$  responses from pCu-ML1-transformed *yvc1Δ* cells were re-plotted from Fig. 6 for comparison.
